# Supplementary material for: A Vaccine Based on the A/ASIA/G-VII Lineage of Foot-and-Mouth Disease Virus Offers Low Levels of Protection against Circulating Viruses from the A/ASIA/Iran-05 lineage
Source: MDPI journal article supplement (doi:10.3390/v14010097), 2022-01-06
Supplement: s1 [file s1]

**A/Asia/GVII vaccine vs A/Asia/Iran-05 lineage – Supplementary Tables**

**Supplementary Table S1: Animal groups, vaccination, challenge and clinical signs post challenge. T = Tongue; M = Mouth and lips; N = Nostrils; RF = Right Fore-limb; LF = Left Fore-limb; RH = Right Hind-limb; LH = Left Hind-limb; BF = Both Fore-limb; BH = Both Hind-limb**

| Group      |                                                                                                                                                             | Animal ID | 4 dpc             | 8 dpc                | Status post-challenge |
|------------|-------------------------------------------------------------------------------------------------------------------------------------------------------------|-----------|-------------------|----------------------|-----------------------|
| Full dose  | Vaccination of cattle with 2 ml A/ASIA/G-VII monovalent oil adjuvant vaccine (full dose) and challenged 21 days later with cattle adapted A/IRN/10/2018     | 2780      |                   |                      | Protected             |
|            |                                                                                                                                                             | 2781      | N, LF, RF, LH, RH | T, N, LF, RF, LH, RH | Not Protected         |
|            |                                                                                                                                                             | 2782      |                   |                      | Protected             |
|            |                                                                                                                                                             | 2783      | RF, LH, RH        | T, RF, LH, RH        | Not Protected         |
|            |                                                                                                                                                             | 2784      |                   |                      | Protected             |
| 1/4 dose   | Vaccination of cattle with 0.5 ml A/ASIA/G-VII monovalent oil adjuvant vaccine (1/4 dose) and challenged 21 days later with cattle adapted A/IRN/10/2018    | 2785      | LF, RF, LH, RH    | LF, RF, LH, RH       | Not Protected         |
|            |                                                                                                                                                             | 2786      | LF, LH            | LH                   | Not Protected         |
|            |                                                                                                                                                             | 2787      | RH                | T, M, RH             | Not Protected         |
|            |                                                                                                                                                             | 2788      | LF, LH, LH        | LF, RF, LH, RH       | Not Protected         |
|            |                                                                                                                                                             | 2789      |                   | T                    | Protected             |
| 1/16 dose  | Vaccination of cattle with 0.125 ml A/ASIA/G-VII monovalent oil adjuvant vaccine (1/16 dose) and challenged 21 days later with cattle adapted A/IRN/10/2018 | 2790      | LF, LH            | T, M, LF, LH, RH     | Not Protected         |
|            |                                                                                                                                                             | 2791      | LF, LH, RH        | T, LF, RF, LH, RH    | Not Protected         |
|            |                                                                                                                                                             | 2792      |                   | T, M, LF             | Not Protected         |
|            |                                                                                                                                                             | 2793      |                   | LH                   | Not Protected         |
|            |                                                                                                                                                             | 2794      |                   | T, N                 | Protected             |
| UV Control | Unvaccinated cattle, challenged with cattle adapted A/IRN/10/2018                                                                                           | 2795      | N, LF, RF, LH, RH | T, LF, RF, LH, RH    | Not Protected         |
|            |                                                                                                                                                             | 2796      | N, LF, RF, LH, RH | T, N, LF, RF, LH, RH | Not Protected         |
|            |                                                                                                                                                             | 2797      | N, LF, RF, LH, RH | T, LF, RF, LH, RH    | Not Protected         |

**Supplementary Table S2: Serum antibody titres (log<sub>10</sub>) against A/IRN/22/2015 in cattle vaccinated with A/Asia/G-VII vaccine in a heterologous potency test with A/IRN/10/2018 challenge. The animals were vaccinated either with a full dose, one fourth dose or one sixteenth dose of A/Asia/G-VII vaccine and were challenged 21 days after vaccination (0 DPC). DPC = Day post challenge. - = titre <0.6**

| Groups     | Animal ID | -21 DPC | -14 DPC | -7 DPC | 0 DPC | 1 DPC | 2 DPC | 3 DPC | 4 DPC | 5 DPC | 6 DPC | 7 DPC | 8 DPC |
|------------|-----------|---------|---------|--------|-------|-------|-------|-------|-------|-------|-------|-------|-------|
| Full dose  | 2780      | <0.60   | 1.35    | 1.20   | 1.50  | 1.35  | 1.65  | 1.95  | 1.65  | 2.40  | ≥2.85 | 2.70  | ≥2.85 |
|            | 2781      | <0.60   | 1.35    | 1.50   | 1.35  | 1.50  | 1.20  | 1.65  | 1.80  | 2.55  | ≥2.85 | ≥2.85 | ≥2.85 |
|            | 2782      | <0.60   | 1.05    | 1.65   | 1.95  | 1.80  | 1.65  | 1.65  | 2.10  | 2.55  | 2.70  | ≥2.85 | ≥2.85 |
|            | 2783      | <0.60   | 1.05    | 1.35   | 1.20  | 1.20  | 1.80  | 1.50  | 2.25  | ≥2.85 | ≥2.85 | ≥2.85 | ≥2.85 |
|            | 2784      | <0.60   | 0.90    | 1.50   | 1.50  | 1.65  | 1.65  | 1.20  | 1.95  | 2.55  | 2.70  | ≥2.85 | ≥2.85 |
| 1/4 dose   | 2785      | <0.60   | <0.60   | 0.60   | <0.60 | 0.60  | 0.60  | 0.90  | 1.20  | 1.65  | 2.55  | 2.55  | ≥2.85 |
|            | 2786      | <0.60   | 1.20    | 1.20   | 1.20  | 1.20  | 1.35  | 1.50  | 1.80  | ≥2.85 | ≥2.85 | ≥2.85 | ≥2.85 |
|            | 2787      | <0.60   | 0.75    | 0.90   | 0.60  | 0.90  | 0.75  | 1.05  | 1.65  | 2.40  | 2.70  | ≥2.85 | ≥2.85 |
|            | 2788      | <0.60   | 0.75    | 1.05   | 1.05  | 0.75  | 0.75  | 1.20  | 1.95  | ≥2.85 | ≥2.85 | ≥2.85 | ≥2.85 |
|            | 2789      | <0.60   | 1.05    | 1.50   | 1.65  | 1.50  | 1.65  | 1.65  | 2.10  | 2.55  | ≥2.85 | ≥2.85 | ≥2.85 |
| 1/16 dose  | 2790      | <0.60   | <0.60   | 0.60   | <0.60 | <0.60 | 0.75  | 0.75  | 1.20  | 2.40  | ≥2.85 | ≥2.85 | ≥2.85 |
|            | 2791      | <0.60   | <0.60   | 0.90   | 0.60  | 0.75  | 0.90  | 0.75  | 1.95  | 2.70  | ≥2.85 | ≥2.85 | ≥2.85 |
|            | 2792      | <0.60   | <0.60   | 0.75   | 1.05  | 1.20  | 1.05  | 1.05  | 1.80  | ≥2.85 | ≥2.85 | ≥2.85 | ≥2.85 |
|            | 2793      | <0.60   | 0.75    | 1.05   | 0.60  | 0.75  | 0.75  | 0.75  | 1.65  | 1.95  | ≥2.85 | ≥2.85 | ≥2.85 |
|            | 2794      | <0.60   | <0.60   | 0.75   | 0.90  | 0.90  | 0.75  | 1.05  | 1.65  | 2.70  | ≥2.85 | ≥2.85 | ≥2.85 |
| UV control | 2795      | <0.60   | <0.60   | <0.60  | <0.60 | <0.60 | 0.75  | <0.60 | <0.60 | 0.75  | 0.90  | 1.35  | 1.80  |
|            | 2796      | <0.60   | <0.60   | <0.60  | <0.60 | <0.60 | 0.75  | <0.60 | <0.60 | 1.05  | 1.35  | 1.65  | 1.65  |
|            | 2797      | <0.60   | <0.60   | <0.60  | <0.60 | <0.60 | <0.60 | <0.60 | <0.60 | 0.60  | 1.20  | 1.50  | 1.80  |

**Supplementary Table S3: Heterologous serum antibody titres (log<sub>10</sub>) against A/IRN/10/2018 in cattle vaccinated with A/Asia/G-VII vaccine in a heterologous potency test with A/IRN/10/2018 challenge. The animals were vaccinated either with a full dose, one fourth dose or one sixteenth dose of A/Asia/G-VII vaccine and were challenged 21 days after vaccination (0 DPC). DPC = Day post challenge. - = titre <0.6**

| Groups     | Animal ID | -21 DPC | -14 DPC | -7 DPC | 0 DPC | 1 DPC | 2 DPC | 3 DPC | 4 DPC | 5 DPC | 6 DPC | 7 DPC | 8 DPC |
|------------|-----------|---------|---------|--------|-------|-------|-------|-------|-------|-------|-------|-------|-------|
| Full dose  | 2780      | <0.60   | 1.05    | <0.60  | 0.90  | 0.75  | 0.75  | 1.05  | 1.20  | 2.55  | 2.70  | 2.55  | ≥2.85 |
|            | 2781      | <0.60   | <0.60   | <0.60  | <0.60 | <0.60 | <0.60 | 0.75  | 1.65  | 2.40  | ≥2.85 | ≥2.85 | ≥2.85 |
|            | 2782      | <0.60   | 0.60    | 0.60   | 0.75  | 0.90  | 0.90  | 1.20  | 1.35  | 2.40  | 2.55  | 2.70  | ≥2.85 |
|            | 2783      | <0.60   | 0.60    | <0.60  | <0.60 | <0.60 | <0.60 | 0.90  | 1.95  | 2.55  | ≥2.85 | ≥2.85 | ≥2.85 |
|            | 2784      | <0.60   | 0.75    | 0.75   | 0.90  | 0.75  | 1.05  | 1.05  | 1.05  | 2.10  | 2.55  | 2.70  | ≥2.85 |
| 1/4 dose   | 2785      | <0.60   | 0.60    | <0.60  | <0.60 | <0.60 | <0.60 | <0.60 | 1.05  | 1.80  | 2.70  | 2.70  | ≥2.85 |
|            | 2786      | <0.60   | <0.60   | 0.60   | <0.60 | <0.60 | <0.60 | 1.35  | 1.50  | 2.70  | ≥2.85 | ≥2.85 | ≥2.85 |
|            | 2787      | <0.60   | <0.60   | <0.60  | <0.60 | <0.60 | <0.60 | 1.05  | 1.50  | 2.70  | ≥2.85 | ≥2.85 | ≥2.85 |
|            | 2788      | <0.60   | <0.60   | <0.60  | <0.60 | <0.60 | <0.60 | 1.05  | 1.95  | 2.70  | ≥2.85 | ≥2.85 | ≥2.85 |
|            | 2789      | <0.60   | <0.60   | 0.60   | <0.60 | 0.60  | 0.90  | 0.75  | 1.35  | 2.25  | ≥2.85 | ≥2.85 | ≥2.85 |
| 1/16 dose  | 2790      | <0.60   | <0.60   | <0.60  | <0.60 | <0.60 | <0.60 | 0.60  | 1.20  | 2.70  | 2.70  | ≥2.85 | ≥2.85 |
|            | 2791      | <0.60   | <0.60   | <0.60  | <0.60 | <0.60 | 0.75  | 0.90  | 1.80  | 2.70  | ≥2.85 | ≥2.85 | ≥2.85 |
|            | 2792      | <0.60   | <0.60   | <0.60  | 0.60  | <0.60 | 0.75  | 0.60  | 1.50  | ≥2.85 | ≥2.85 | ≥2.85 | ≥2.85 |
|            | 2793      | <0.60   | <0.60   | <0.60  | <0.60 | <0.60 | 0.75  | <0.60 | 1.50  | 2.70  | 2.70  | ≥2.85 | ≥2.85 |
|            | 2794      | <0.60   | <0.60   | <0.60  | <0.60 | <0.60 | <0.60 | <0.60 | 1.20  | 2.55  | 2.70  | ≥2.85 | ≥2.85 |
| UV control | 2795      | <0.60   | <0.60   | <0.60  | <0.60 | <0.60 | 1.05  | 0.75  | 1.05  | 1.95  | 2.40  | 2.70  | 2.70  |
|            | 2796      | <0.60   | <0.60   | <0.60  | <0.60 | <0.60 | 1.05  | 0.60  | 1.35  | 2.10  | 2.40  | 2.70  | 2.70  |
|            | 2797      | <0.60   | <0.60   | <0.60  | <0.60 | <0.60 | <0.60 | 0.60  | 0.90  | 1.95  | 2.25  | ≥2.85 | ≥2.85 |
